# Supplementary material for: All good things come in threes: first example of a trimorphic, ternary molecular salt complex
Source: Royal Society of Chemistry journal article supplement (doi:10.1039/d0ce01023e), 2020-01-01

## Supplementary Information

*All good things come in threes: an example of a trimorphic, ternary molecular salt complex*

Andreas Lemmerer

### A. Molecular Overlay

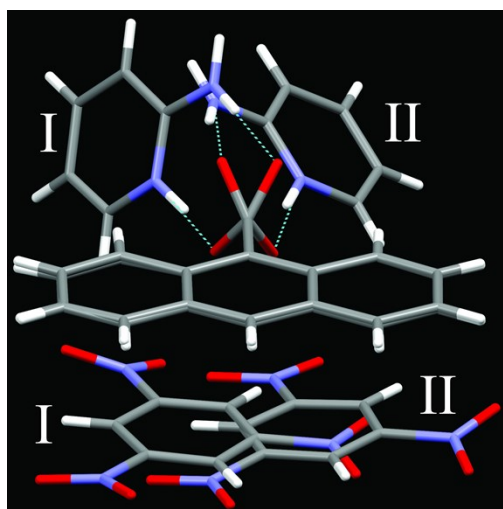

(a) Form I and II

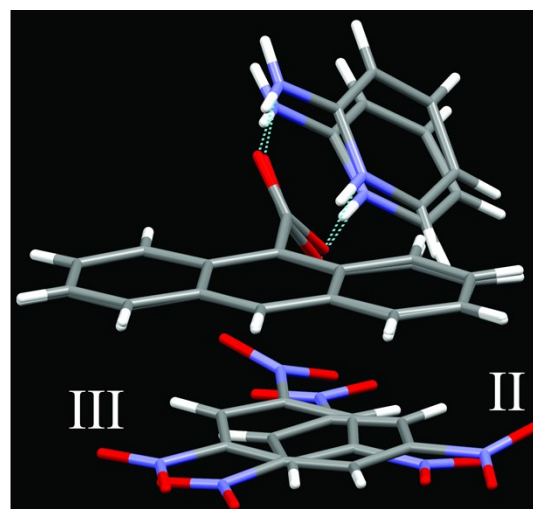

(b) Form II and III

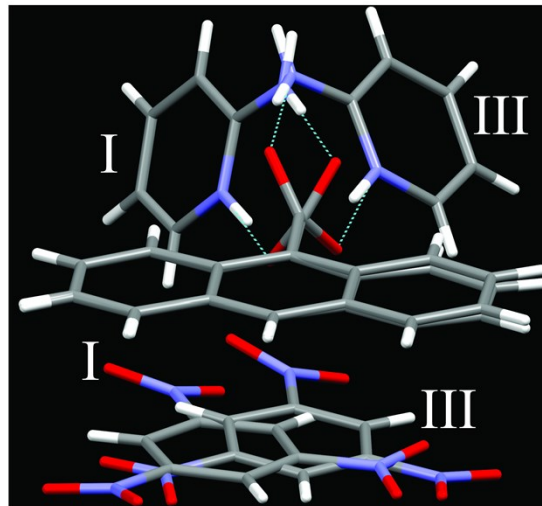

(c) Form I and III

**Figure S1.** Overlays of pairs of polymorphs showing the relative positions to the common 9-ap anion.

## B. Intermolecular Potentials

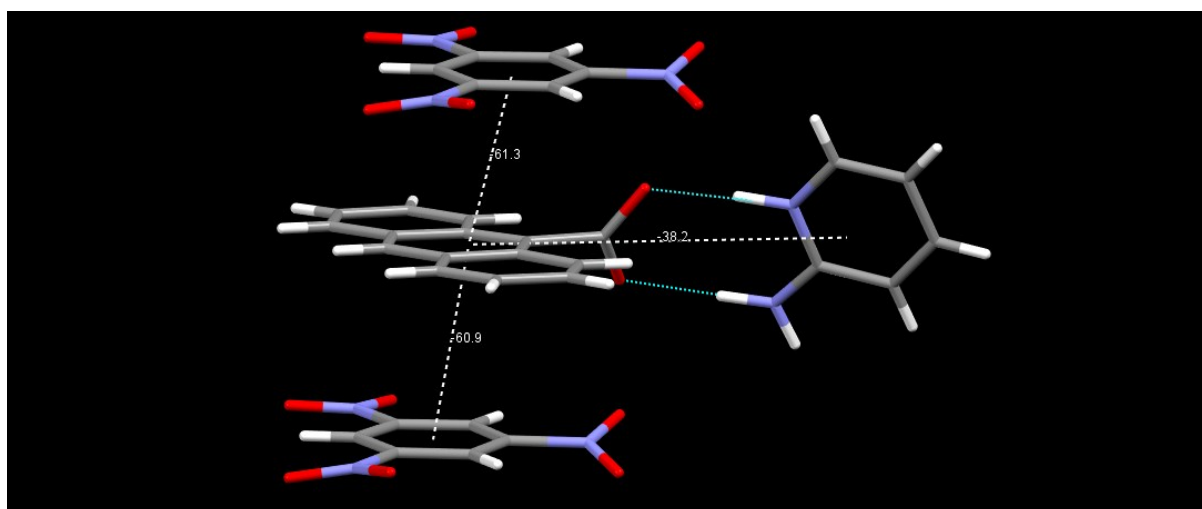

**Figure S2.** Calculated intermolecular potentials using the UNI force field for Form I. Only the strongest three are shown.

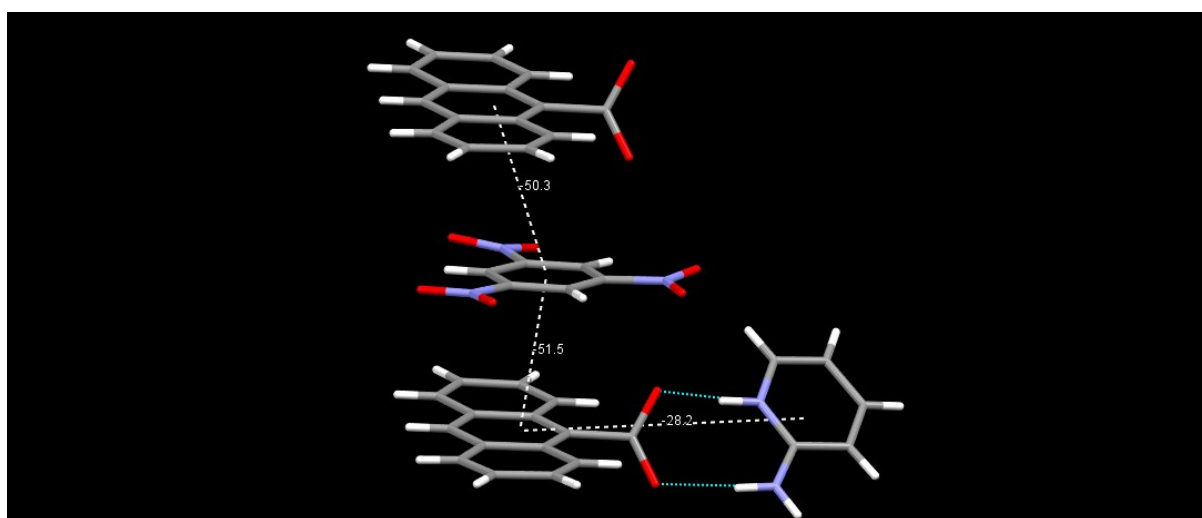

**Figure S3.** Calculated intermolecular potentials using the UNI force field for Form II. Only the strongest three are shown.

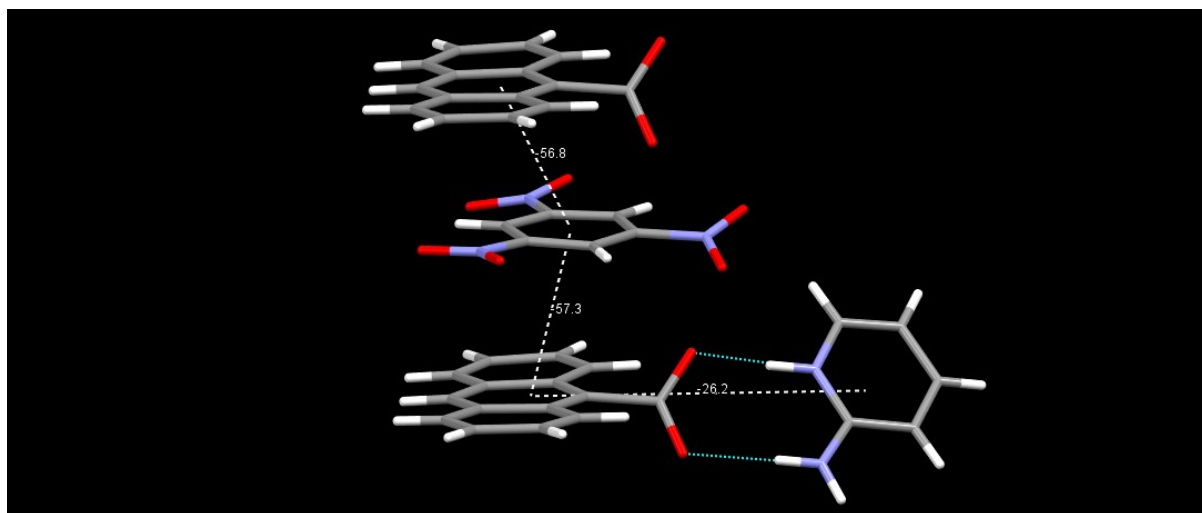

**Figure S4.** Calculated intermolecular potentials using the UNI force field for Form **III**. Only the strongest three are shown.

### C. Experimental Setup

All reagents used for synthesis and characterization were of analytical grade, purchased from Sigma-Aldrich, unless otherwise stated. Reagents were used as received, without further purification. In all experiments, 0.020 g of trinitrobenzene (0.094 mmol), 0.020 g of 9-anthracenecarboxylic acid (0.090 mmol) and 0.010 g of 2-aminopyridine (0.106 mmol) were weighed out. All solutions were heated and stirred and filtered through a 0.45 micron syringe filter.

#### Slow Evaporation Experiments

|                 |                                                                                                 |
|-----------------|-------------------------------------------------------------------------------------------------|
| acetone         | Form <b>I</b>                                                                                   |
| acetonitrile    | Form <b>II</b> and <b>III</b> (repeating this experiment only resulted in form <b>II</b> again) |
| ethanol         | Form <b>I</b>                                                                                   |
| 2-propanol      | Form <b>I</b>                                                                                   |
| acetonitrile    | Form <b>I</b> (solution placed in fridge)                                                       |
| dichloromethane | Form <b>I</b> and <b>II</b>                                                                     |
| 1-butanol       | Form <b>I</b>                                                                                   |
| acetonitrile    | Form <b>I</b> and Form <b>II</b> (needle in lid)                                                |
| ethylacetate    | Form <b>I</b> and Form <b>III</b>                                                               |

#### Fast Evaporation Experiments (in fume hood)

|              |               |
|--------------|---------------|
| 2-butanone   | Form <b>I</b> |
| bromoform    | Form <b>I</b> |
| acetone      | Form <b>I</b> |
| acetonitrile | Form <b>I</b> |
| ethanol      | Form <b>I</b> |
| toluene      | Form <b>I</b> |
| ethylacetate | Form <b>I</b> |

#### Vapour Diffusion

|                     |                                                  |
|---------------------|--------------------------------------------------|
| acetone/hexane      | Form <b>I</b> and <b>II</b>                      |
| acetonitrile/hexane | Form <b>II</b> mainly and Form <b>I</b> a little |
| ethanol/hexane      | Form <b>II</b> only                              |
| ethylacetate/hexane | Form <b>I</b> and <b>III</b>                     |

## D. Single Crystal Diffraction Data

All data collections were obtained on a Bruker Venture D8 Photon CMOS diffractometer with graphite-monochromated  $\text{MoK}\alpha_1$  ( $\lambda = 0.71073 \text{ \AA}$ ) radiation at 173 K using an Oxford Cryostream Plus cooler. The collection method involved  $\omega$ -scans with a  $0.5^\circ$  width. SAINT+ version 6.02.6<sup>1</sup> software was used for data reduction and *SADABS*<sup>2</sup> was used to make empirical absorption corrections. The crystal structures were solved using direct methods on *SHELXS-97*.<sup>3</sup> Non-hydrogen atoms were first refined isotropically, followed by anisotropic refinement by full matrix least-squares calculations based on  $F^2$  using *SHELXL-2017*.<sup>3</sup> C-bound H atoms were located in the difference map, then positioned geometrically and were allowed to ride on their respective parent atoms, with thermal displacement parameters 1.2 times of the parent C atom. The coordinates and isotropic displacement parameters of the N-bound H atoms involved in hydrogen bonding interactions were allowed to refine freely. Diagrams and publication material were generated using *WinGX*,<sup>4</sup> *ORTEP-3*,<sup>4</sup> *PLATON*<sup>5</sup> and *MERCURY*.<sup>6</sup>

1. SAINT+, Version 6.02 (Includes XPREP and SADABS); Bruker AXS Inc: Madison, Wisconsin, USA, 2004.
2. Krause, L., Herbst-Irmer, R., Sheldrick, G. M. & Stalke, D. (2015). *J. Appl. Cryst.* 48, 3–10.
3. Sheldrick, G. M., *Acta Crystallogr., Sect. C.* 2015, 71 (Pt 1), 3-8.
4. Farrugia, L., *J. Appl. Crystallogr.* 2012, 45 (4), 849-854.
5. Spek, A., *Acta Crystallogr., Sect. D.* 2009, 65 (2), 148-155.
6. C. F. Macrae, I. Sovago, S. J. Cottrell, P. T. A. Galek, P. McCabe, E. Pidcock, M. Platings, G. P. Shields, J. S. Stevens, M. Towler and P. A. Wood, *J. Appl. Cryst.* 2020, 53, 226-235.

CCDC 2001329 (Form **I**), 2001329 (Form **II**), and 2001329 (Form **III**) contain(s) the supplementary crystallographic data for this paper. These data are provided free of charge by the joint Cambridge Crystallographic Data Centre and Fachinformationszentrum Karlsruhe Access Structures service [www.ccdc.cam.ac.uk/structures](http://www.ccdc.cam.ac.uk/structures)."

**Table S1.** Crystal data and structure refinement for **Form I**

|                                   |                                                               |                               |
|-----------------------------------|---------------------------------------------------------------|-------------------------------|
| Identification code               | <b>CSD: 2001329</b>                                           |                               |
| Empirical formula                 | C <sub>26</sub> H <sub>19</sub> N <sub>5</sub> O <sub>8</sub> |                               |
| Formula weight                    | 529.46                                                        |                               |
| Temperature                       | 173(2) K                                                      |                               |
| Wavelength                        | 0.71073 Å                                                     |                               |
| Crystal system                    | Monoclinic                                                    |                               |
| Space group                       | P 21/n                                                        |                               |
| Unit cell dimensions              | a = 6.8892(2) Å                                               | $\alpha = 90^\circ$ .         |
|                                   | b = 13.9675(3) Å                                              | $\beta = 93.5340(10)^\circ$ . |
|                                   | c = 24.3771(6) Å                                              | $\gamma = 90^\circ$ .         |
| Volume                            | 2341.22(10) Å <sup>3</sup>                                    |                               |
| Z                                 | 4                                                             |                               |
| Density (calculated)              | 1.502 Mg/m <sup>3</sup>                                       |                               |
| Absorption coefficient            | 0.114 mm <sup>-1</sup>                                        |                               |
| F(000)                            | 1096                                                          |                               |
| Crystal size                      | 0.386 x 0.127 x 0.084 mm <sup>3</sup>                         |                               |
| Theta range for data collection   | 1.674 to 28.000°.                                             |                               |
| Index ranges                      | -9 ≤ h ≤ 9, -18 ≤ k ≤ 18, -32 ≤ l ≤ 31                        |                               |
| Reflections collected             | 46569                                                         |                               |
| Independent reflections           | 5639 [R(int) = 0.0282]                                        |                               |
| Completeness to theta = 25.242°   | 100.0 %                                                       |                               |
| Refinement method                 | Full-matrix least-squares on F <sup>2</sup>                   |                               |
| Data / restraints / parameters    | 5639 / 0 / 364                                                |                               |
| Goodness-of-fit on F <sup>2</sup> | 1.043                                                         |                               |
| Final R indices [I > 2σ(I)]       | R1 = 0.0401, wR2 = 0.1026                                     |                               |
| R indices (all data)              | R1 = 0.0561, wR2 = 0.1112                                     |                               |
| Extinction coefficient            | n/a                                                           |                               |
| Largest diff. peak and hole       | 0.297 and -0.216 e.Å <sup>-3</sup>                            |                               |

**Table S2.** Hydrogen bonds for **Form I** [ $\text{\AA}$  and  $^\circ$ ].

| D-H...A             | d(D-H)  | d(H...A) | d(D...A)   | $\angle(\text{DHA})$ |
|---------------------|---------|----------|------------|----------------------|
| N(5)-H(5A)...O(8)   | 0.97(2) | 1.89(2)  | 2.8563(19) | 178(2)               |
| N(5)-H(5B)...O(8)#1 | 0.92(3) | 1.96(3)  | 2.8588(18) | 166(2)               |
| N(4)-H(4)...O(7)    | 1.01(2) | 1.72(2)  | 2.7098(16) | 168(2)               |

Symmetry transformations used to generate equivalent atoms:

#1 -x,-y+1,-z+1

**Table S3.** Crystal data and structure refinement for **Form II**

|                                   |                                                               |                 |
|-----------------------------------|---------------------------------------------------------------|-----------------|
| Identification code               | <b>CSD: 2001330</b>                                           |                 |
| Empirical formula                 | C <sub>26</sub> H <sub>19</sub> N <sub>5</sub> O <sub>8</sub> |                 |
| Formula weight                    | 529.46                                                        |                 |
| Temperature                       | 173(2) K                                                      |                 |
| Wavelength                        | 0.71073 Å                                                     |                 |
| Crystal system                    | Monoclinic                                                    |                 |
| Space group                       | P 21/c                                                        |                 |
| Unit cell dimensions              | a = 7.8923(11) Å                                              | α = 90°.        |
|                                   | b = 18.908(3) Å                                               | β = 95.838(5)°. |
|                                   | c = 15.969(2) Å                                               | γ = 90°.        |
| Volume                            | 2370.7(6) Å <sup>3</sup>                                      |                 |
| Z                                 | 4                                                             |                 |
| Density (calculated)              | 1.483 Mg/m <sup>3</sup>                                       |                 |
| Absorption coefficient            | 0.113 mm <sup>-1</sup>                                        |                 |
| F(000)                            | 1096                                                          |                 |
| Crystal size                      | 0.68 x 0.44 x 0.26 mm <sup>3</sup>                            |                 |
| Theta range for data collection   | 2.976 to 27.999°.                                             |                 |
| Index ranges                      | -10 ≤ h ≤ 10, -24 ≤ k ≤ 24, -21 ≤ l ≤ 21                      |                 |
| Reflections collected             | 104798                                                        |                 |
| Independent reflections           | 5709 [R(int) = 0.0293]                                        |                 |
| Completeness to theta = 25.242°   | 99.5 %                                                        |                 |
| Refinement method                 | Full-matrix least-squares on F <sup>2</sup>                   |                 |
| Data / restraints / parameters    | 5709 / 0 / 364                                                |                 |
| Goodness-of-fit on F <sup>2</sup> | 1.019                                                         |                 |
| Final R indices [I > 2σ(I)]       | R1 = 0.0377, wR2 = 0.0984                                     |                 |
| R indices (all data)              | R1 = 0.0419, wR2 = 0.1022                                     |                 |
| Extinction coefficient            | n/a                                                           |                 |
| Largest diff. peak and hole       | 0.395 and -0.227 e.Å <sup>-3</sup>                            |                 |



**Table S4.** Hydrogen bonds for form **II** [ $\text{\AA}$  and  $^\circ$ ].

| D-H...A              | d(D-H)    | d(H...A)  | d(D...A)   | $\angle(\text{DHA})$ |
|----------------------|-----------|-----------|------------|----------------------|
| C(23)-H(23)...O(1)#1 | 0.95      | 2.56      | 3.3786(16) | 144                  |
| N(4)-H(4A)...O(7)    | 0.960(17) | 1.657(17) | 2.6121(12) | 172(2)               |
| N(5)-H(5A)...O(8)    | 0.894(18) | 1.959(19) | 2.8385(14) | 168(2)               |
| N(5)-H(5B)...O(1)#1  | 0.864(18) | 2.490(18) | 3.2899(14) | 154(1)               |

Symmetry transformations used to generate equivalent atoms:

#1  $-x+1, -y, -z+1$

**Table S5.** Crystal data and structure refinement for **Form III**

|                                   |                                                               |                              |
|-----------------------------------|---------------------------------------------------------------|------------------------------|
| Identification code               | <b>CSD: 2001331</b>                                           |                              |
| Empirical formula                 | C <sub>26</sub> H <sub>19</sub> N <sub>5</sub> O <sub>8</sub> |                              |
| Formula weight                    | 529.46                                                        |                              |
| Temperature                       | 173(2) K                                                      |                              |
| Wavelength                        | 0.71073 Å                                                     |                              |
| Crystal system                    | Triclinic                                                     |                              |
| Space group                       | P -1                                                          |                              |
| Unit cell dimensions              | a = 7.0834(5) Å                                               | $\alpha = 77.196(2)^\circ$ . |
|                                   | b = 12.8271(9) Å                                              | $\beta = 85.946(2)^\circ$ .  |
|                                   | c = 13.8555(9) Å                                              | $\gamma = 81.281(2)^\circ$ . |
| Volume                            | 1212.51(14) Å <sup>3</sup>                                    |                              |
| Z                                 | 2                                                             |                              |
| Density (calculated)              | 1.450 Mg/m <sup>3</sup>                                       |                              |
| Absorption coefficient            | 0.110 mm <sup>-1</sup>                                        |                              |
| F(000)                            | 548                                                           |                              |
| Crystal size                      | 0.895 x 0.346 x 0.120 mm <sup>3</sup>                         |                              |
| Theta range for data collection   | 3.018 to 28.000°.                                             |                              |
| Index ranges                      | -9<=h<=9, -16<=k<=16, -18<=l<=18                              |                              |
| Reflections collected             | 40646                                                         |                              |
| Independent reflections           | 5832 [R(int) = 0.0345]                                        |                              |
| Completeness to theta = 25.242°   | 99.5 %                                                        |                              |
| Refinement method                 | Full-matrix least-squares on F <sup>2</sup>                   |                              |
| Data / restraints / parameters    | 5832 / 0 / 364                                                |                              |
| Goodness-of-fit on F <sup>2</sup> | 1.014                                                         |                              |
| Final R indices [I>2sigma(I)]     | R1 = 0.0445, wR2 = 0.1079                                     |                              |
| R indices (all data)              | R1 = 0.0555, wR2 = 0.1144                                     |                              |
| Extinction coefficient            | n/a                                                           |                              |
| Largest diff. peak and hole       | 0.282 and -0.255 e.Å <sup>-3</sup>                            |                              |

**Table S6.** Hydrogen bonds for 19va\_np908\_p [ $\text{\AA}$  and  $^\circ$ ].

| D-H...A             | d(D-H)    | d(H...A)  | d(D...A)   | $\angle(\text{DHA})$ |
|---------------------|-----------|-----------|------------|----------------------|
| N(4)-H(4A)...O(7)   | 0.969(18) | 1.648(19) | 2.5993(14) | 166(2)               |
| N(5)-H(5A)...O(8)   | 0.886(19) | 1.986(19) | 2.8570(15) | 167(2)               |
| N(5)-H(5B)...O(8)#3 | 0.860(18) | 2.271(17) | 2.9147(14) | 132(1)               |

Symmetry transformations used to generate equivalent atoms:

#1 -x+1,-y+1,-z+1 #2 -x+1,-y+1,-z #3 -x,-y+1,-z

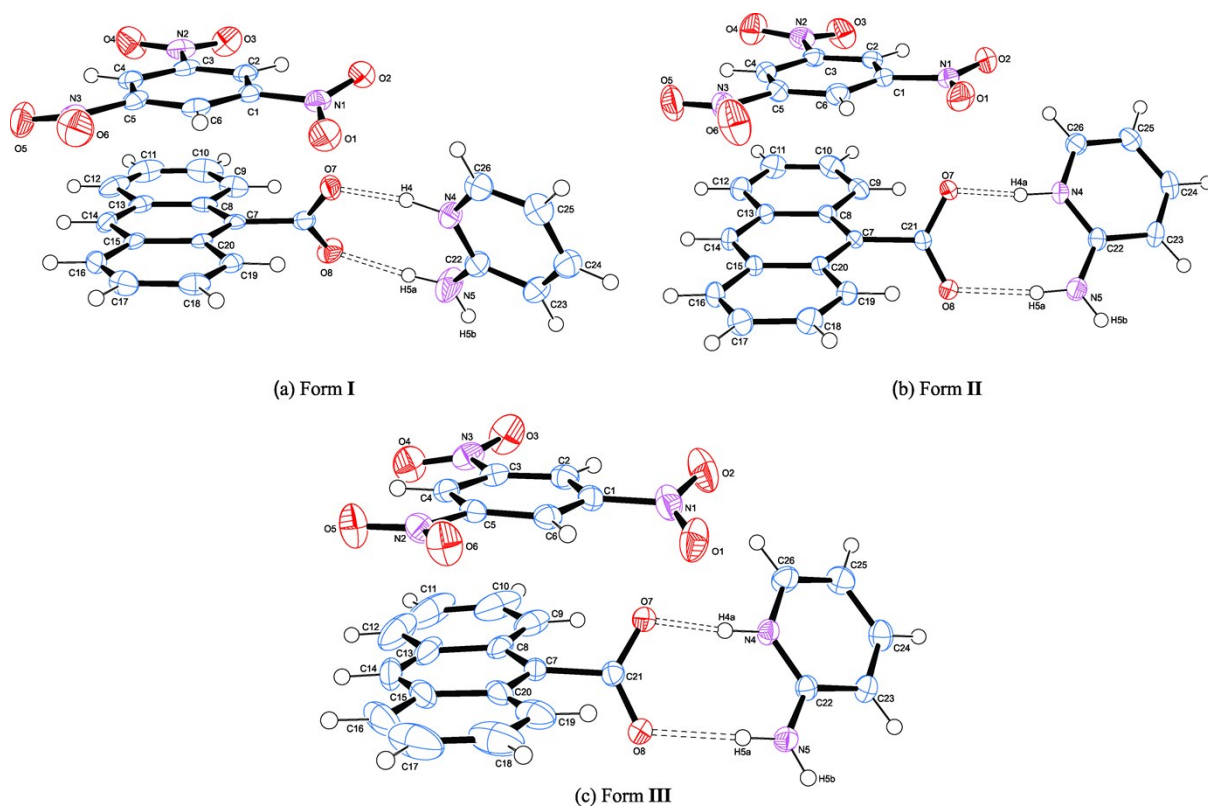

**Figure S5.** Asymmetric unit of (2-aminopyridinium)·(9-anthracenecarboxylate)·(trinitrobenzene), indicating the numbering scheme, ellipsoids at 50 % probability. Hydrogen bonding interactions shown with a dashed bond.

## E. Powder X-ray Diffraction

Powder X-ray diffraction data patterns were collected at 293 K on a Bruker D2 Phaser diffractometer which employed a sealed tube Co X-ray source ( $\lambda = 1.78897 \text{ \AA}$ ), operating at 30 kV and 10 mA, and LynxEye PSD detector in Bragg-Brentano geometry. The calculated powder diffraction patterns were computed from the single crystal data which was collected at 173 K using Mercury. The peak positions are shifted resulting from the different temperatures at which the samples were measured. The peak intensities vary due to preferred orientation. For form III, the sample consisted of a few crystals gently crushed on a zero-background holder and so there is significant preferred orientation.

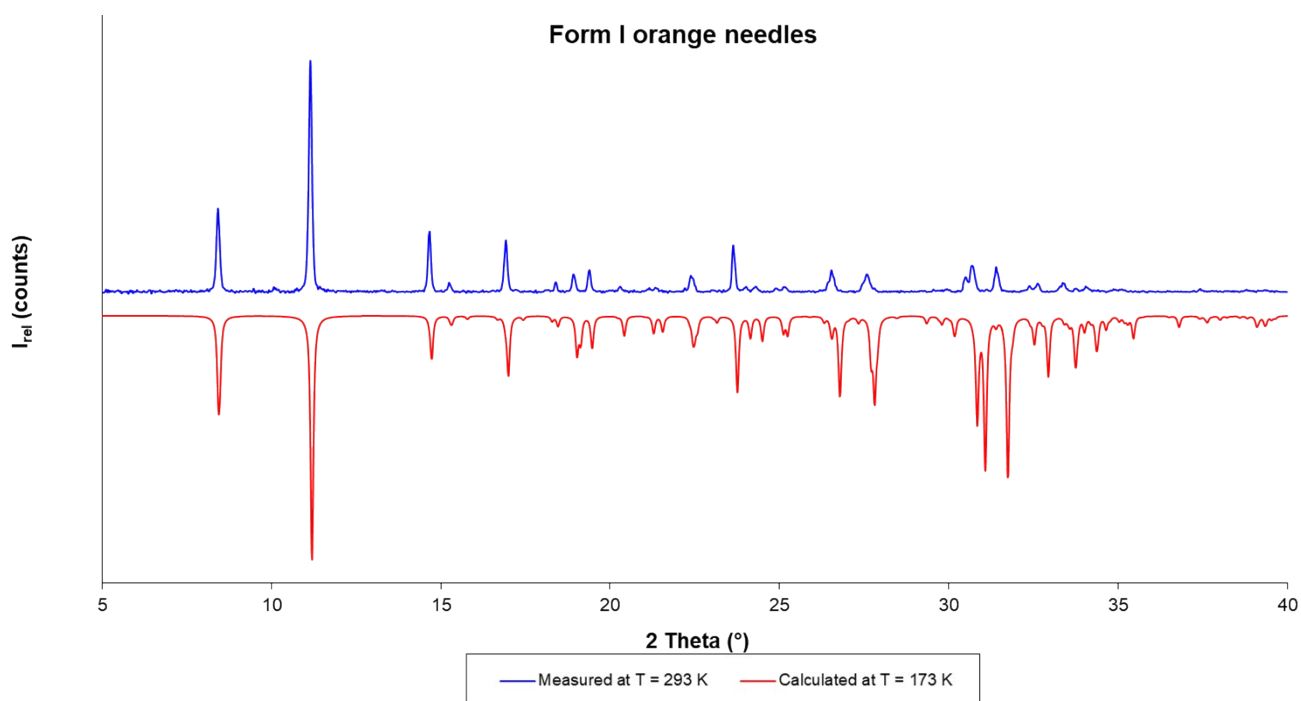

**Figure S6** Measured vs. calculated PXRD of the orange form I

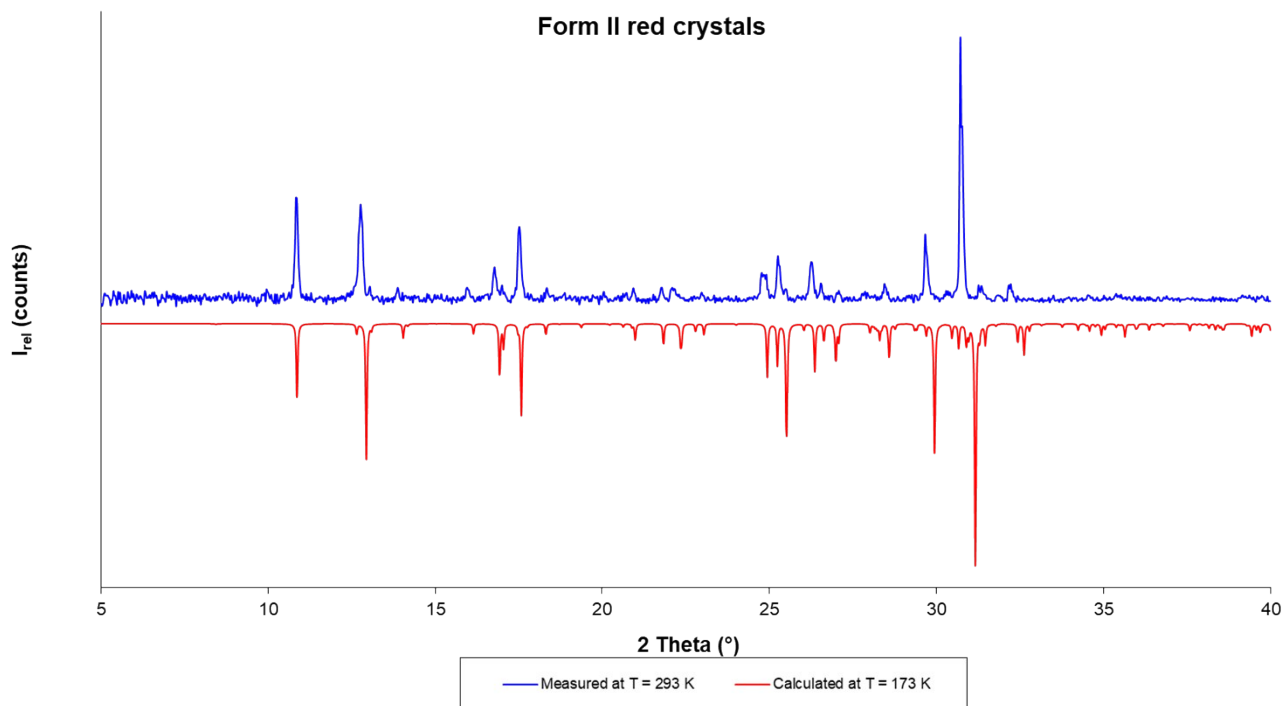

**Figure S7** Measured vs. calculated PXRD of the red form **II**.

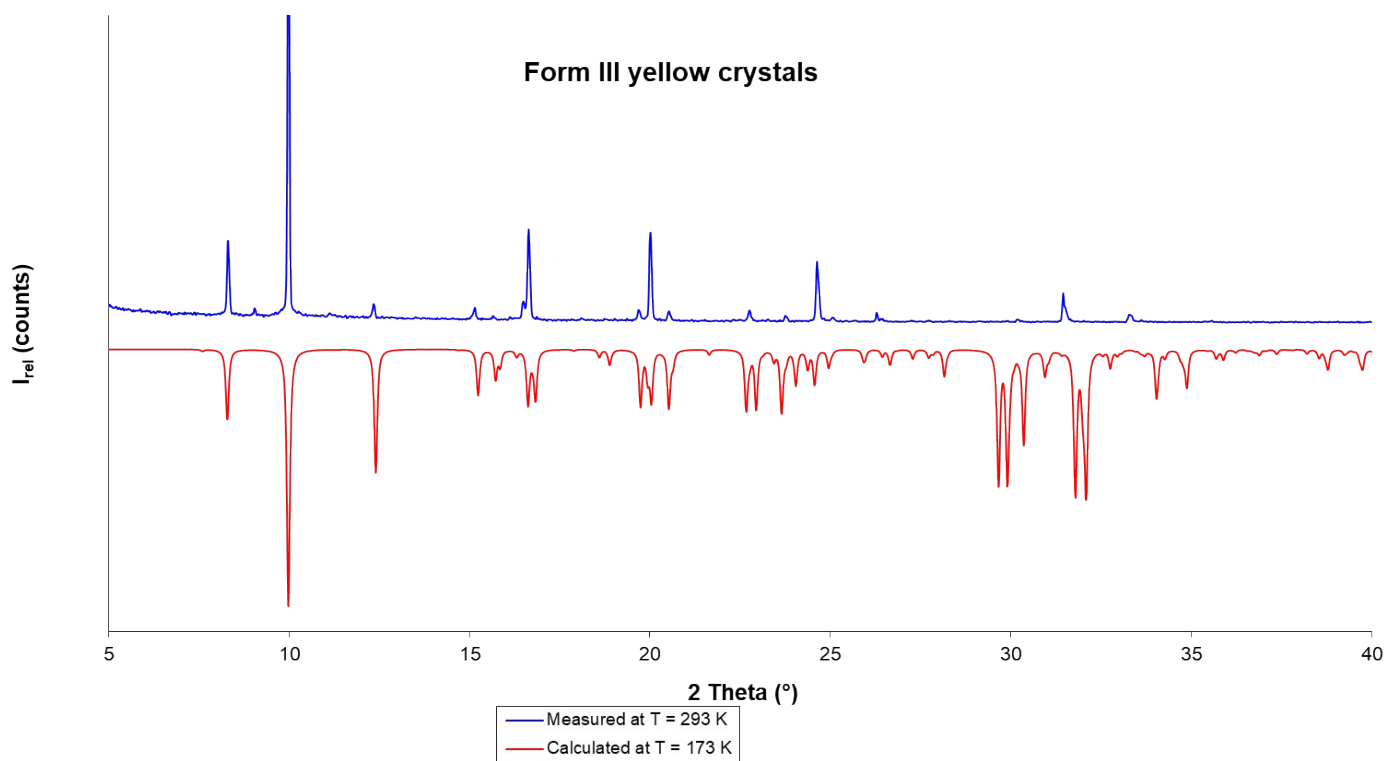

**Figure S8** Measured vs. calculated PXRD of the yellow form **III**. The samples of a few crystals were gently crushed on a zero-background holder and so there is significant preferred orientation.

## F. DSC Results and Traces

Differential scanning calorimetry data (Table S7-9) were collected using a Mettler Toledo 822e with aluminium pans under N<sub>2</sub> gas purge (10 mL/min). *Star SW 16.20* was used for instrument control and data analysis. Exothermic events were shown as peaks. The temperature and energy calibrations were performed using pure indium (purity 99.99%, m.p. 156.6 °C, heat of fusion 28.45 J g<sup>-1</sup>).

**Table S7.** Results of DSC traces for **Form I**.

| Polymorph at Start | Sample State | Code   | Heating Rate / K min <sup>-1</sup> | Sample Code               | T <sub>onset</sub> / °C | T <sub>peak</sub> / °C | Integral / J g <sup>-1</sup> |
|--------------------|--------------|--------|------------------------------------|---------------------------|-------------------------|------------------------|------------------------------|
| Form 1             | Powder PXRD  | DSC 4  | 10                                 | NP910                     | 155.86                  | 158.39                 | -16.32                       |
| Form 1             | Powder PXRD  | 20a110 | 10                                 | NP910                     | 156.94                  | 159.06                 | -14.38                       |
| Form 1             | Powder PXRD  | 20a111 | 10                                 | NP910                     | 156.88                  | 159.16                 | -10.45                       |
|                    |              |        |                                    | <b>Average</b>            | <b>156.6</b>            | <b>158.9</b>           | <b>-13.7</b>                 |
|                    |              |        |                                    | <b>Standard Deviation</b> | <b>0.5</b>              | <b>0.3</b>             | <b>2.4</b>                   |

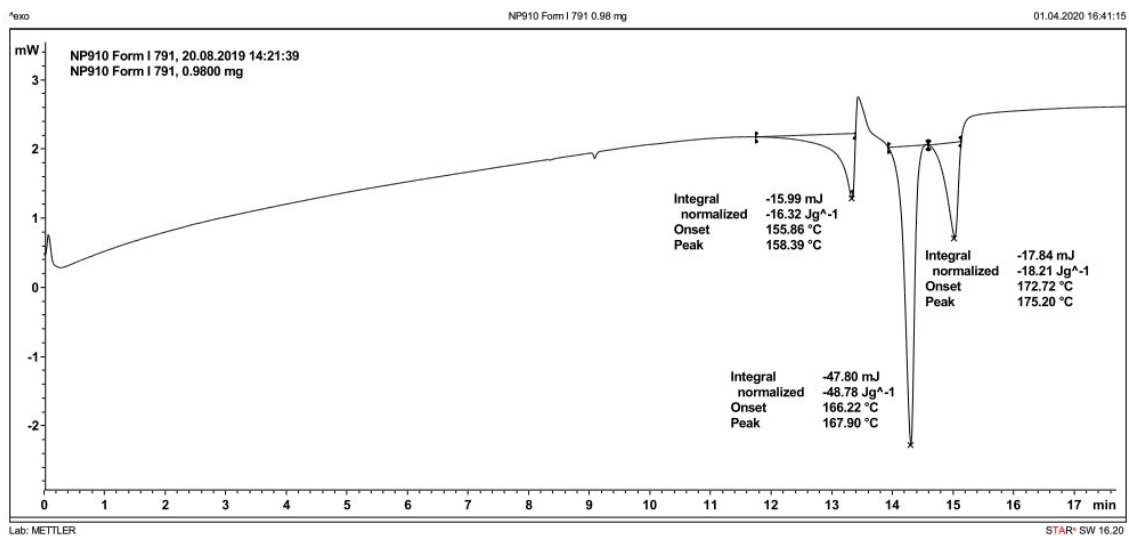

exo

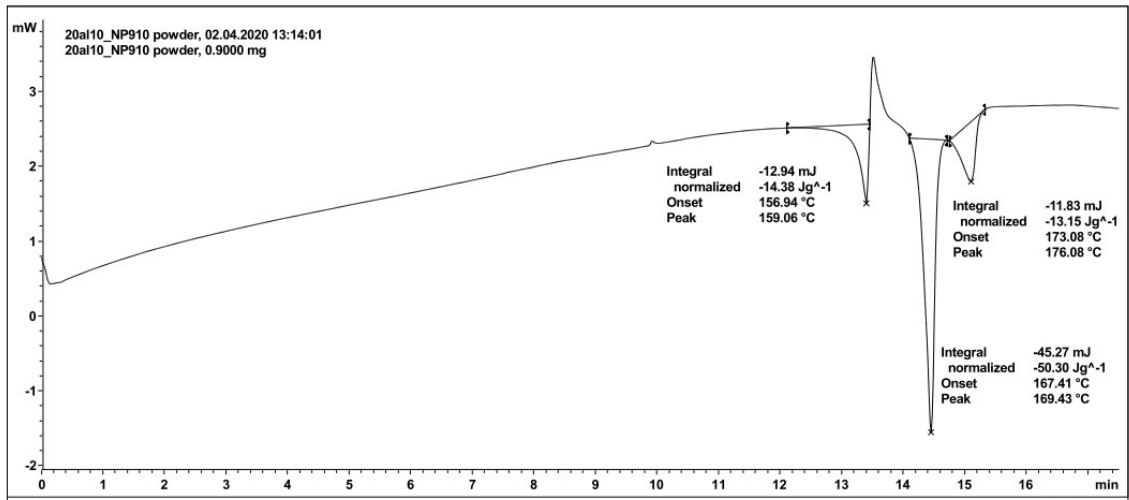

exo

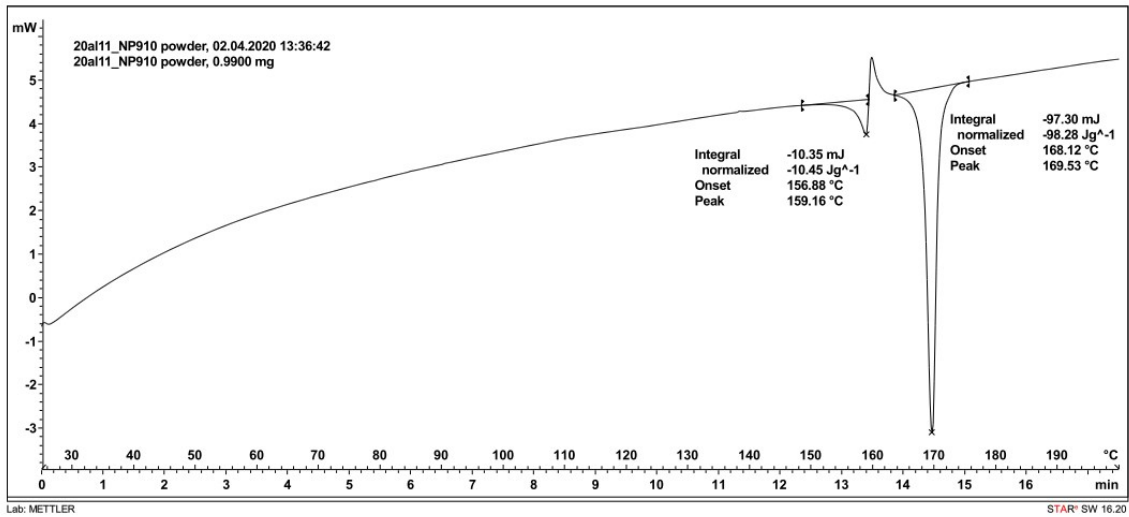



**Table S8.** Results of DSC traces for **Form II**.

| Polymorph at Start | Sample State  | Code  | Heating Rate / K min <sup>-1</sup> | Sample Code               | T <sub>onset</sub> / °C | T <sub>peak</sub> / °C | Integral / J g <sup>-1</sup> |
|--------------------|---------------|-------|------------------------------------|---------------------------|-------------------------|------------------------|------------------------------|
| Form 2             | ground powder | 20a15 | 10                                 | NP976                     | 168.34                  | 169.41                 | -119.78                      |
| Form 2             | crystals      | 20a17 | 10                                 | NP976                     | 167.53                  | 169.65                 | -122.77                      |
| Form 2             | crystals      | 20a19 | 10                                 | NP976                     | 168.10                  | 169.63                 | -120.29                      |
|                    |               |       |                                    | <b>Average</b>            | <b>168.0</b>            | <b>169.6</b>           | <b>-120.9</b>                |
|                    |               |       |                                    | <b>Standard Deviation</b> | <b>0.3</b>              | <b>0.1</b>             | <b>1.3</b>                   |

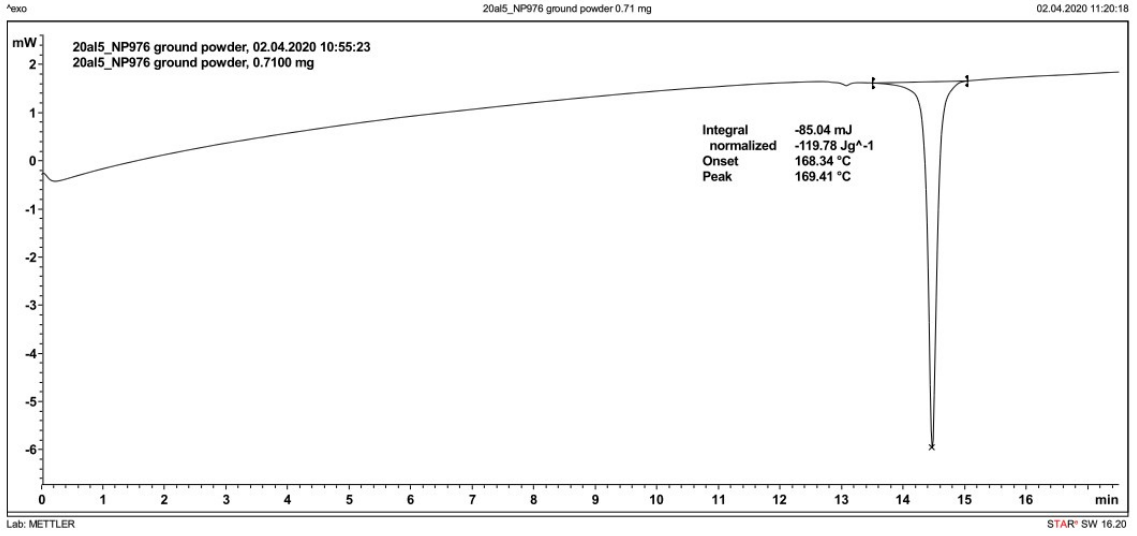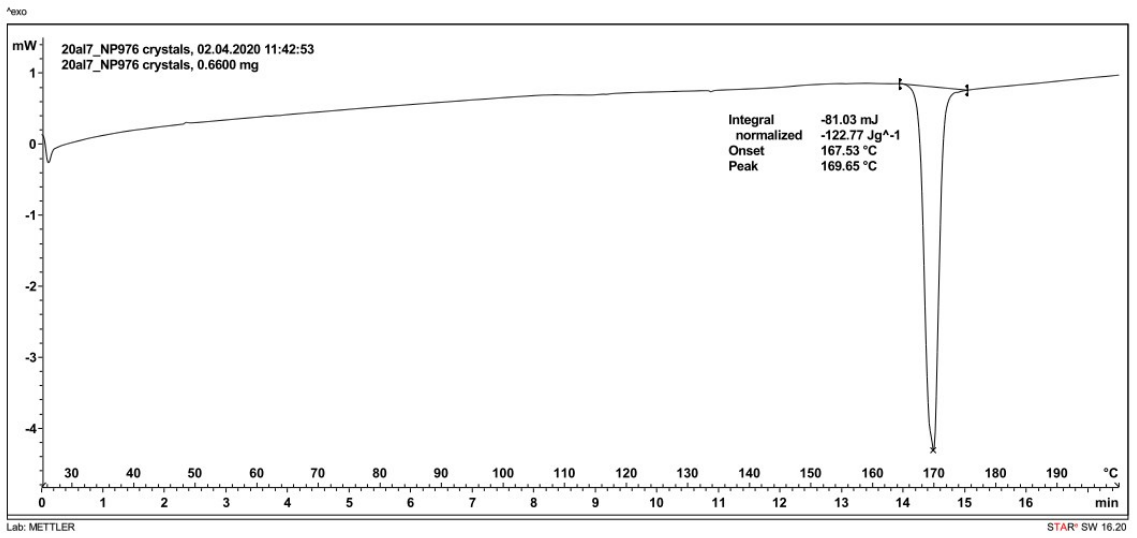

^exo

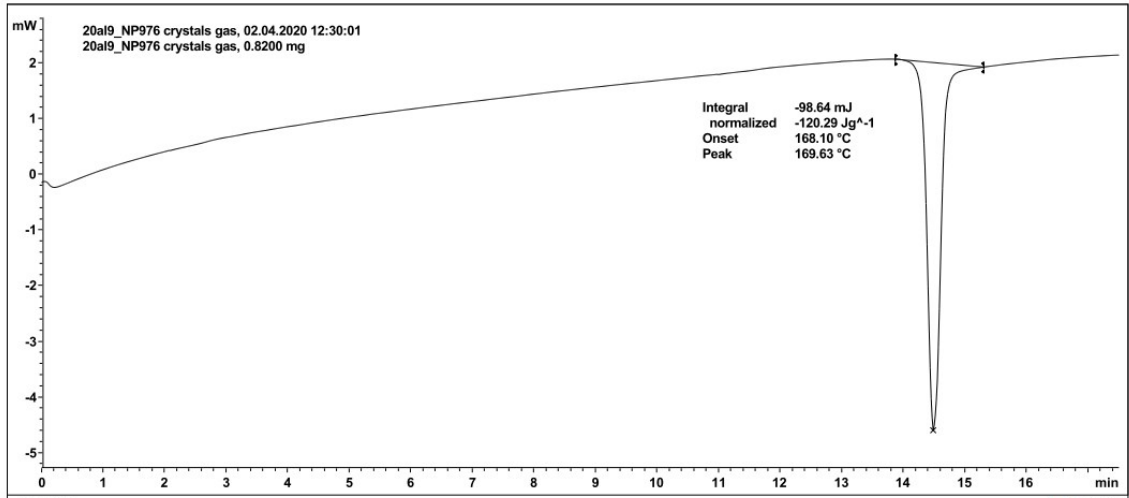

**Table S9.** Results of DSC traces for **Form III**.

| Polymorph at Start | Sample State | Code   | Heating Rate / K min <sup>-1</sup> | Sample Code               | T <sub>onset</sub> / °C | T <sub>peak</sub> / °C | Integral / J g <sup>-1</sup> |
|--------------------|--------------|--------|------------------------------------|---------------------------|-------------------------|------------------------|------------------------------|
| Form 1             | crystals     | 20a128 | 10                                 | NP956                     | 175.96                  | 177.54                 | -67.76                       |
| Form 1             | crystals     | 20a118 | 10                                 | NP954                     | 176.06                  | 178.03                 | -71.55                       |
| Form 1             | crystals     | 20a122 | 10                                 | NP956                     | 177.53                  | 178.99                 | -62.97                       |
|                    |              |        |                                    | <b>Average</b>            | <b>176.5</b>            | <b>178.0</b>           | <b>-67.4</b>                 |
|                    |              |        |                                    | <b>Standard Deviation</b> | <b>0.7</b>              | <b>0.7</b>             | <b>3.5</b>                   |

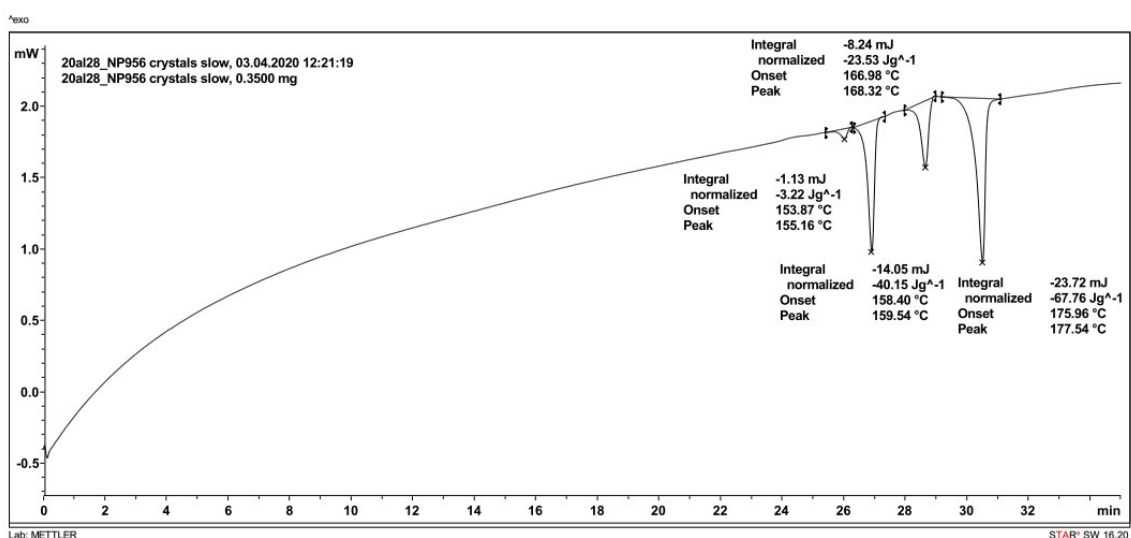

exo

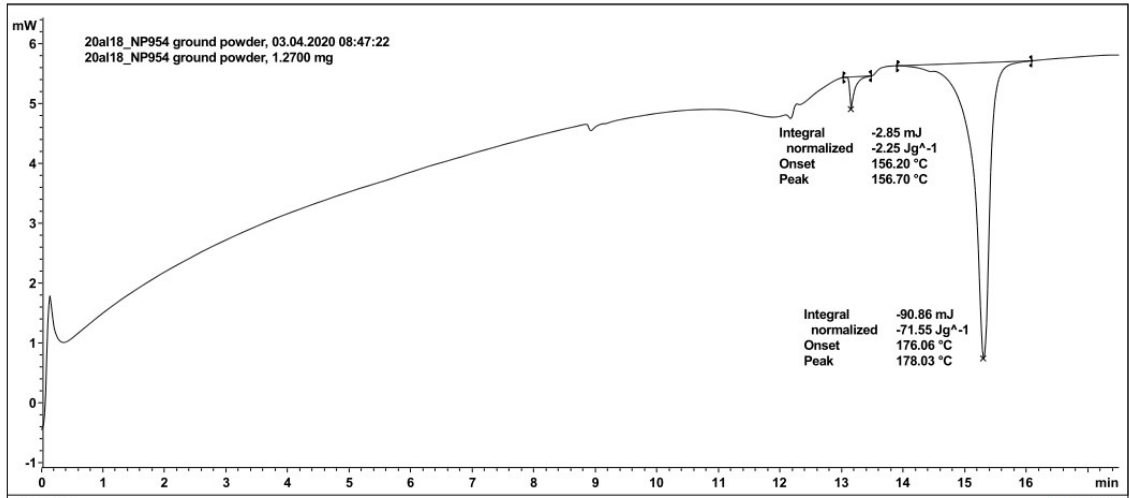

exo

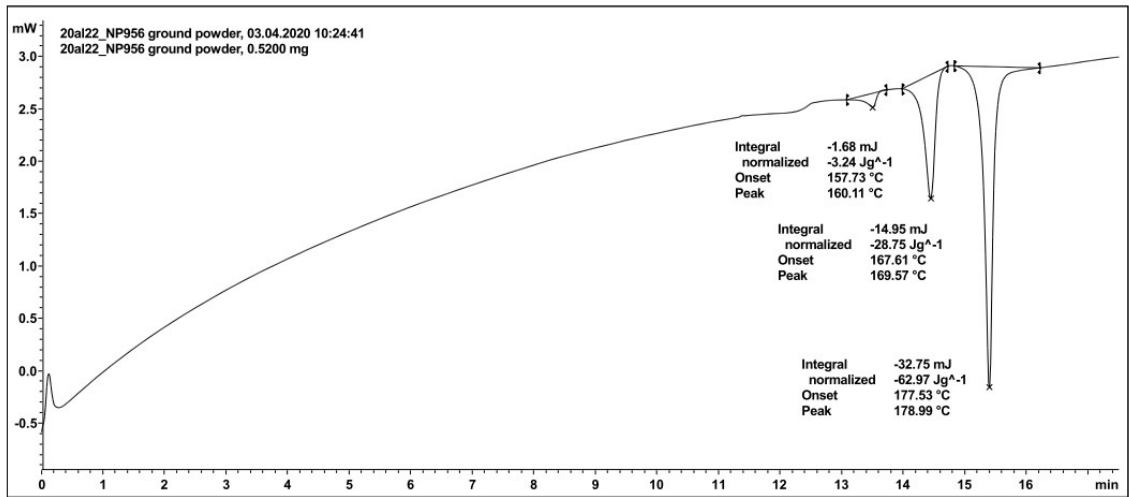

Supplement: d0ce01023e1.pdf [file d0ce01023e1.pdf]
